# Supplementary material for: Digital Transcriptome Analysis of Putative Sex-Determination Genes in Papaya (Carica papaya)
Source: PLoS One. 2012 Jul 16;7(7):e40904. doi: 10.1371/journal.pone.0040904 (PMC3397944; doi:10.1371/journal.pone.0040904)
Supplement: Table S2 — BAC clones of the papaya sex chromosomes used for mapping of SuperSAGE tags. * These clones were regarded as BAC clones on the X chromosome. (XLS) [file pone.0040904.s004.xls]

## Sheet: Sheet1
Sex chromosome	BAC clones (Accession No.)
	53E10(FJ429366), 66N15(FJ429369), 75H06(FJ429370), 90D06(FJ429371),
	99O03(FJ429372), 102N12(FJ429373), PH41F24(EF625817), PH42B05(EF625818),
	PH54H01(EF625819), PH76M08(EF625820), PH85B24(EF661024), PH94E22(EF625821),
	PH95B12(EF661025), 17J04(AC238761), 66N15(AC238768), 72J22(AC238620),
	89I15(AC238633), 27G03(AC239146), 69C01(AC238618), PH76M08(EF625820),
	83L14(CG680755 - CG680757, CG680765 - CG680777), 71E16(AC239163),
Yh chromosome	67C23(CG680534 - CG680559), 83D03(CG680732 - CG680754), 79C23(AC238625),
	31E20(CG680477 - CG680485), 95F17(CG680952 - CG680975), PH89M06(AM778096),
	89A05(CG680805 - CG680827), 74J19(CG680614 - CG680627), 80L24(AC239164),
	93J16(CG680850 - CG680871), 96C10(CG680994 - CG681019), DM62K05(EU369761),
	95D22(CG680927 - CG680951), 93O24(CG680872 - CG680899), 82H21(AC238627.1),
	52B03(CG680503 - CG680515), 33L10(CG680486 - CG680502), 52H15(AC238762),
	PH53E18(EF661026), PH61H02(EF661023), DM10G24(EU369760), PH12G20(GU799580),
	PH95I24(GU799579), PH89P09(GU799578), 99B01(AC238637), 87M18(AC238632),
	85C03(AC238631), 84J07(AC238629), 83B06(AC238628), 80F18(AC238626),
	54M13(AC238609), 46O19(AC238599), 40J04(AC238598), 39A12(AC238597),
	31E12(AC238595), 12I03(AC238590), 51A03(AC238603), 23D07(AC238592),
X chromosome	08K16(AC239251), 65C15(AC239160), 30B21(AC239147), 23D15(AC239144),
	10J17(AC239138), 79M13(AC239204), 54M22(AC239202), 50J21(AC239200),
	49A07(AC239150), 06M23(AC239136), 93K15(AC239170), 84M10(AC239166),
	69D05(AC239161), 65C06(AC239159), 49N10(AC239151), 38K02(AC239149),
	24L08(AC239145), 22E07(AC239143), 136D11(AC239253)
	54A04(AC239201)*, 69D24(AC239162), 54A09(AC239152) *
