# Supplementary material for: Digital Transcriptome Analysis of Putative Sex-Determination Genes in Papaya (Carica papaya)
Source: PLoS One. 2012 Jul 16;7(7):e40904. doi: 10.1371/journal.pone.0040904 (PMC3397944; doi:10.1371/journal.pone.0040904)
Supplement: Table S5 — SuperSAGE tags mapped on the sex chromosome and organelle genome sequences simultaneously. * Deduced proteins were determined by BLASTX searching of genomic sequences upstream of the SuperSAGE tags as described in method. (XLS) [file pone.0040904.s007.xls]

## Sheet: Sheet4
Tag ID	Tag sequence	Mapped clone name	sex chromosomes	Start	End	tag count						Accession no., deduced protein*
						P1	P2	P3	P4	P5	P6
Cp1338	catggccatatgagttgatacgatca	41F24	Yh	85563	85588	59	416	157	162	18	127	YP_003434340.1, photosystem II Cp43 chlorophyll apoprotein
Cp1787	catgcaagtcgaacgttgttttcggg	31E20	Yh	83	58	138	207	209	30	80	55	YP_784437, NADH-plastoquinone oxidoreductase
Cp3569	catgcccgaagtcgttaccttaaccg	94E22	Yh	96912	96937	64	97	35	35	29	91	YP_001671737.1, NADH dehydrogenase subunit 1
Cp9058	catgaagccggaatcgctagtaatcg	94E22	Yh	96814	96839	27	19	16	13	7	18	YP_001671737.1, NADH dehydrogenase subunit 1
Cp9571	catgacccctcttaactgatacagga	41F24	Yh	85192	85217	4	74	2	2	2	9	AAZ04075.1, photosystem II 44 kDa protein
Cp11144	catgagagcgggacccttcccttggg	83D03	Yh	508	483	3	11	16	8	10	26	No significant homologies found.
Cp13591	catgtttgttgccaggagcaacgaga	52H15	Yh	92313	92338	10	10	5	11	4	13	ACp51427, photosystem I P700 chlorophyll a apoprotein A2
Cp16395	catgcatgtttgttgccaggagcaac	52H15	Yh	92309	92334	12	2	8	4	6	6	NP_043151, photosystem I P700 chlorophyll a apoprotein A2
Cp16815	catgcccctttaggttctttaaattc	41F24	Yh	84980	85005	4	19	4	0	0	10	ACH47544, photosystem II Cp43 chlorophyll apoprotein
Cp19997	catgcacttctgggacctgagactct	41F24	Yh	84254	84279	7	11	5	2	1	1	ACH47544, photosystem II Cp43 chlorophyll apoprotein
Cp28402	catggtaaaatccctctatccctatg	89M06	Yh	112019	112044	0	1	3	7	0	4	YP_003587789, photosystem II 44 kDa protein
